# Supplementary material for: Calcium-Binding Proteins S100A8 and S100A9: Investigation of Their Immune Regulatory Effect in Myeloid Cells
Source: MDPI journal article supplement (doi:10.3390/ijms19071833), 2018-06-21
Supplement: s1 [file s1]

**Table S1.** Primer sequences used for qPCR.

| <b>Genes</b> | <b>Forward Primer (5'-3')</b> | <b>Reverse Primer (5'-3')</b> |
|--------------|-------------------------------|-------------------------------|
| B-actin      | ACCACACCTTCTACAATGAG          | TAGCACAGCCTGGATAGC            |
| GAPDH        | ACCCACTCCTCCACCTTTGAC         | TCCACCACCCTGTTGCTGTAG         |
| IL-10        | GCGCTGTCATCGATTTCTTCC         | GTAGATGCCTTTCTCTTGGAGCTTA     |
| IL-1b        | TGGCTTATTACAGTGGCAATG         | GTGGTGGTCGGAGATTCTG           |
| S100A8       | GGGAATTTCCATGCCGTCT           | CCTTTTTCCTGATATACTGAGGACACT   |
| S100A9       | CAGCTGGAACGCAACATAGA          | TCAGCTGCTTGTCTGCATTT          |
| STST3        | CACGCCTTCTACAGACTG            | CATCCTGGAGATTCTCTACC          |
| TGF-b1       | CCCAGCATCTGCAAAGCTC           | GTCAATGTACAGCTGCCGCA          |
| TNF-a        | CCCCAGGGACCTCTCTCTAATC        | TACAACATGGGCTACAGGCTTG        |

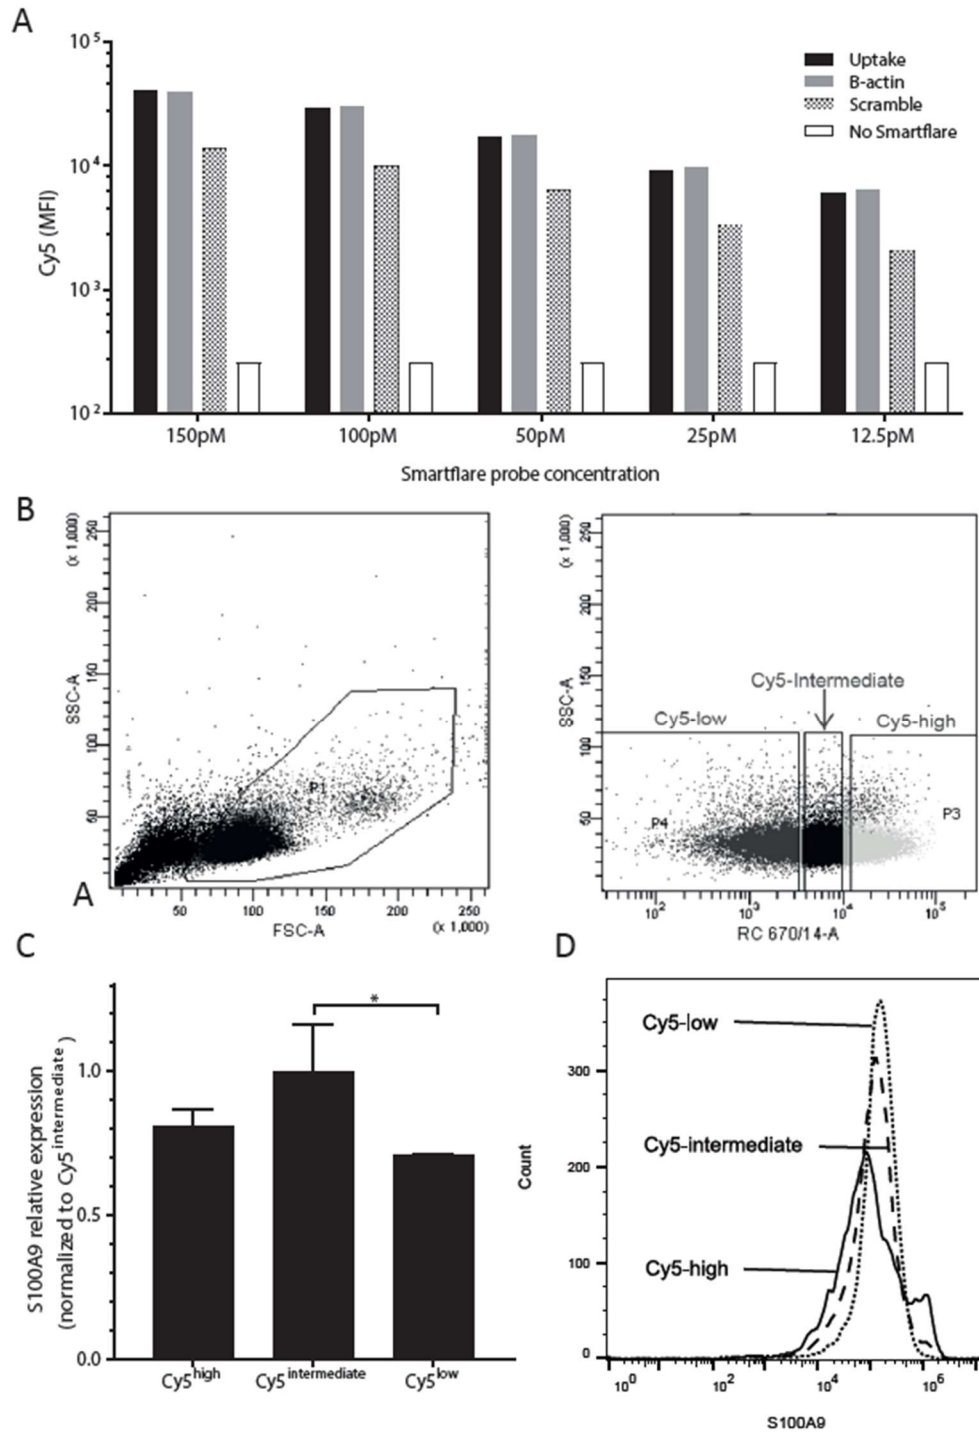

**Figure S1.** Smart Flare failed to report the mRNA level in live cells. (A) Monocytes were incubated for 16 hours with different amounts of SmartFlare probe. The scrambled control probe produced strong signals, indicating high background levels. (B) Monocytes were sorted into three subsets based on the Cy5 fluorescence intensity: Cy5-high, Cy5-intermediate, and Cy5-low. (C,D) The mRNA (C) and protein (D) level of S100A9 in three FACS-sorted subsets were not consistent with the SmartFlare signals. Flags show means with SD. Differences were tested by one-way ANOVA with Tukey's multiple comparison tests. Data in panel C are shown as means  $\pm$  SD of three biological replicates. \*P<0.05.
